CORRECTION

# Correction: Risk factors associated with sexually transmitted infections among HIV infected men who have sex with men

The *PLOS ONE* Staff

The following information is missing from the Funding section: This work was funded by the National Natural Science Foundation of China (81373060), the Six Major Human Resources Project of Jiangsu Province (WSN-015), Preventive Medicine Project of Jiangsu Province (Y2013071) and the Science and Technology Program of Nantong City (MS12015125). The publisher apologizes for the error.

## Reference

1. Xian Y, Zhu B, Zhang X, Ma P, Wei Y, Xia H, et al. (2017) Risk factors associated with sexually transmitted infections among HIV infected men who have sex with men. *PLoS ONE* 12(2): e0170635. doi:[10.1371/journal.pone.0170635](https://doi.org/10.1371/journal.pone.0170635) PMID: [28158317](https://pubmed.ncbi.nlm.nih.gov/28158317/)

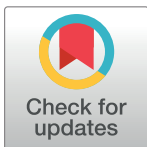

## OPEN ACCESS

**Citation:** The *PLOS ONE* Staff (2017) Correction: Risk factors associated with sexually transmitted infections among HIV infected men who have sex with men. *PLoS ONE* 12(4): e0176579. <https://doi.org/10.1371/journal.pone.0176579>

**Published:** April 20, 2017

**Copyright:** © 2017 The PLOS ONE Staff. This is an open access article distributed under the terms of the [Creative Commons Attribution License](https://creativecommons.org/licenses/by/4.0/), which permits unrestricted use, distribution, and reproduction in any medium, provided the original author and source are credited.
